# Supplementary material for: Population Genetic Structure and Origins of Native Hawaiians in the Multiethnic Cohort Study
Source: PLoS One. 2012 Nov 7;7(11):e47881. doi: 10.1371/journal.pone.0047881 (PMC3492381; doi:10.1371/journal.pone.0047881)
Supplement: Table S2 — Summary counts of subjects used for AIMS, GWAS, and mtDNA analysist. (XLS) [file pone.0047881.s003.xls]

## Sheet: supp. table 2
Supplemental Table 2. Sample information for GWAS and mitochondrial sequence data*
race/ethnicity	sample	father	mother	mito	GWAS	female
H100	1	H	H	1	1	1
H100	2	H	H	1	1	1
H100	3	H	H	1	1	1
H100	4	H	H	1	1	1
H100	5	H	H	1	1	1
H100	6	H	H	1	1	1
H100	7	H	H	1	1	1
H100	8	H	H	1	1	1
H100	9	H	H	1	0	0
H100	10	H	H	1	0	0
H100	11	H	H	1	0	0
H100	12	H	H	1	0	0
H100	13	H	H	1	0	0
H100	14	H	H	1	0	0
H100	15	H	H	1	0	0
H100	16	H	H	1	0	0
H100	17	H	H	1	0	0
H100	18	H	H	1	0	0
H100	19	H	H	1	0	0
H100	20	H	H	1	0	0
H100	21	H	H	1	0	0
H100	22	H	H	1	0	0
H100	23	H	H	1	0	0
H100	24	H	H	1	0	0
H100	25	H	H	1	0	0
H100	26	H	H	1	0	0
H100	27	H	H	1	0	0
H100	28	H	H	1	0	0
H100	29	H	H	1	0	0
H100	30	H	H	1	0	0
H100	31	H	H	1	0	0
H100	32	H	H	1	0	0
H100	33	H	H	1	0	0
H100	34	H	H	1	0	0
H100	35	H	H	1	0	0
H100	36	H	H	1	0	0
H100	37	H	H	1	0	0
H100	38	H	H	1	0	0
H100	39	H	H	1	0	0
H100	40	H	H	1	0	0
H100	41	H	H	1	0	0
H100	42	H	H	1	0	0
H100	43	H	H	1	0	0
H100	44	H	H	1	0	0
H100	45	H	H	1	0	0
H100	46	H	H	1	0	0
H100	47	H	H	1	0	0
H100	48	H	H	1	0	0
H100	49	H	H	1	0	0
H100	50	H	H	1	0	0
H100	51	H	H	1	0	0
H100	52	H	H	1	0	0
H100	53	H	H	1	0	0
H100	54	H	H	1	0	0
H100	55	H	H	1	0	0
H100	56	H	H	1	0	0
H100	57	H	H	1	0	0
H100	58	H	H	1	0	0
H100	59	H	H	1	0	0
H100	60	H	H	1	0	0
H100	61	H	H	1	0	0
H100	62	H	H	1	0	0
H100	63	H	H	1	0	0
H100	64	H	H	1	0	0
H100	65	H	H	1	0	0
H100	66	H	H	1	0	0
H100	67	H	H	1	0	0
H100	68	H	H	1	0	0
H100	69	H	H	1	0	0
H100	70	H	H	1	0	0
H100	71	H	H	1	0	0
H100	72	H	H	1	0	0
H100	73	H	H	1	0	0
H100	74	H	H	1	0	0
H100	75	H	H	1	0	0
H100	76	H	H	1	0	0
H100	77	H	H	1	0	0
H100	78	H	H	1	0	0
H100	79	H	H	1	0	0
H100	80	H	H	1	0	0
H100	81	H	H	1	0	0
H100	82	H	H	1	0	0
H100	83	H	H	1	0	0
H100	84	H	H	1	0	0
H100	85	H	H	1	0	0
H100	86	H	H	1	0	0
H100	87	H	H	1	0	0
H100	88	H	H	1	0	0
H100	89	H	H	1	0	0
H100	90	H	H	1	0	0
H100	91	H	H	1	0	0
H100	92	H	H	1	0	0
H100	93	H	H	1	0	0
H100	94	H	H	1	0	0
H100	95	H	H	1	0	0
H100	96	H	H	1	0	0
H100	97	H	H	1	0	0
H100	98	H	H	1	0	0
H100	99	H	H	1	0	0
H100	100	H	H	1	0	0
H100	101	H	H	1	0	0
H100	102	H	H	1	0	0
H100	103	H	H	1	0	0
H100	104	H	H	1	0	0
H100	105	H	H	1	0	0
H100	106	H	H	1	0	0
H100	107	H	H	1	0	0
H100	108	H	H	1	0	0
H100	109	H	H	1	0	0
H100	110	H	H	1	0	0
H100	111	H	H	1	0	0
H100	112	H	H	1	0	0
H100	113	H	H	1	0	0
H100	114	H	H	1	0	0
H100	115	H	H	1	0	0
H100	116	H	H	1	0	0
H100	117	H	H	1	0	0
H100	118	H	H	1	0	0
H100	119	H	H	1	0	0
H100	120	H	H	1	0	0
H100	121	H	H	1	0	0
H100	122	H	H	1	0	0
H100	123	H	H	1	0	0
H100	124	H	H	1	0	0
H100	125	H	H	1	0	0
H100	126	H	H	1	0	0
H100	127	H	H	1	0	0
H100	128	H	H	1	0	0
H100	129	H	H	1	0	0
H100	130	H	H	1	0	0
H100	131	H	H	1	0	0
H100	132	H	H	1	0	0
H100	133	H	H	1	0	0
H100	134	H	H	1	0	0
H100	135	H	H	1	0	0
H100	136	H	H	1	0	0
H100	137	H	H	1	0	0
H100	138	H	H	1	0	0
H100	139	H	H	1	0	0
H100	140	H	H	1	0	0
H100	141	H	H	1	0	0
H100	142	H	H	1	0	0
H100	143	H	H	1	0	0
H100	144	H	H	1	0	0
H100	145	H	H	1	0	0
H100	146	H	H	1	0	0
H100	147	H	H	1	0	0
H100	148	H	H	1	0	0
H100	149	H	H	1	0	0
H100	150	H	H	1	0	0
H100	151	H	H	1	0	0
H100	152	H	H	1	0	0
H100	153	H	H	1	0	0
H100	154	H	H	1	0	0
H100	155	H	H	1	0	0
H100	156	H	H	1	0	0
H100	157	H	H	1	0	0
H100	158	H	H	1	0	0
H100	159	H	H	1	0	0
H100	160	H	H	1	0	0
H100	161	H	H	0	1	1
H100	162	H	H	0	1	1
H100	163	H	H	0	1	1
H100	164	H	H	0	1	1
H100	165	H	H	0	1	1
H100	166	H	H	0	1	1
H100	167	H	H	0	1	1
H100	168	H	H	0	1	1
H100	169	H	H	0	1	1
H100	170	H	H	0	1	1
H100	171	H	H	0	1	1
H100	172	H	H	0	1	1
H100	173	H	H	0	1	1
H100	174	H	H	0	1	1
H100	175	H	H	0	1	1
H100	176	H	H	0	1	1
H100	177	H	H	0	1	1
H100	178	H	H	0	1	1
H100	179	H	H	0	1	1
H100	180	H	H	0	1	1
H100	181	H	H	0	1	1
H100	182	H	H	0	1	1
H100	183	H	H	0	1	1
H100	184	H	H	0	1	1
H100	185	H	H	0	1	1
H100	186	H	H	0	1	1
H100	187	H	H	0	1	1
H100	188	H	H	0	1	1
H100	189	H	H	0	1	1
H100	190	H	H	0	1	1
H100	191	H	H	0	1	1
H100	192	H	H	0	1	1
HA50	193	C	H	0	1	1
HA50	194	C	H	0	1	1
HA50	195	C	H	0	1	1
HA50	196	C	H	0	1	1
HA50	197	C	H	0	1	1
HA50	198	C	H	0	1	1
HA50	199	C	H	0	1	1
HA50	200	F	H	0	1	1
HA50	201	F	H	0	1	1
HA50	202	F	H	0	1	1
HA50	203	F	H	0	1	1
HA50	204	F	H	0	1	1
HA50	205	F	H	0	1	1
HA50	206	F	H	0	1	1
HA50	207	F	H	0	1	1
HA50	208	F	H	0	1	1
HA50	209	F	H	0	1	1
HA50	210	F	H	0	1	1
HA50	211	H	C	0	1	1
HA50	212	H	C	0	1	1
HA50	213	H	J	0	1	1
HA50	214	H	J	0	1	1
HA50	215	J	H	0	1	1
HA50	216	J	H	0	1	1
HA50	217	J	H	0	1	1
HA50	218	J	H	0	1	1
HA50	219	J	H	0	1	1
HA50	220	J	H	0	1	1
HA50	221	K	H	0	1	1
HA50	222	K	H	0	1	1
HW50	223	E	H	0	1	1
HW50	224	E	H	0	1	1
HW50	225	E	H	0	1	1
HW50	226	E	H	0	1	1
HW50	227	E	H	0	1	1
HW50	228	E	H	0	1	1
HW50	229	E	H	0	1	1
HW50	230	E	H	0	1	1
HW50	231	E	H	0	1	1
HW50	232	E	H	0	1	1
HW50	233	E	H	0	1	1
HW50	234	E	H	0	1	1
HW50	235	E	H	0	1	1
HW50	236	E	H	0	1	1
HW50	237	E	H	0	1	1
HW50	238	E	H	0	1	1
HW50	239	E	H	0	1	1
HW50	240	E	H	0	1	1
HW50	241	E	H	0	1	1
HW50	242	E	H	0	1	1
HW50	243	E	H	0	1	1
HW50	244	E	H	0	1	1
HW50	245	E	H	0	1	1
HW50	246	E	H	0	1	1
HW50	247	E	H	0	1	1
HW50	248	E	H	0	1	1
HW50	249	H	E	0	1	1
HW50	250	H	E	0	1	1
HW50	251	H	E	0	1	1
HW50	252	H	E	0	1	1
HW50	253	H	E	0	1	1
HW50	254	H	E	0	1	1
HW50	255	H	E	0	1	1
HW50	256	H	E	0	1	1
HW50	257	H	E	0	1	1
HA75	258	H	HC	0	1	1
HA75	259	H	HC	0	1	1
HA75	260	H	HC	0	1	1
HA75	261	H	HC	0	1	1
HA75	262	H	HC	0	1	1
HA75	263	H	HC	0	1	1
HA75	264	H	HC	0	1	1
HA75	265	H	HC	0	1	1
HA75	266	H	HC	0	1	1
HA75	267	H	HC	0	1	1
HA75	268	H	HC	0	1	1
HA75	269	H	HC	0	1	1
HA75	270	H	HC	0	1	1
HA75	271	H	HC	0	1	1
HA75	272	H	HC	0	1	1
HA75	273	H	HC	0	1	1
HA75	274	H	HC	0	1	1
HA75	275	H	HF	0	1	1
HA75	276	HC	H	0	1	1
HA75	277	HC	H	0	1	1
HA75	278	HC	H	0	1	1
HA75	279	HC	H	0	1	1
HA75	280	HJ	H	0	1	1
HA75	281	HJ	H	0	1	1
HA75	282	HJ	H	0	1	1
HW75	283	H	HE	0	1	1
HW75	284	H	HE	0	1	1
HW75	285	H	HE	0	1	1
HW75	286	H	HE	0	1	1
HW75	287	H	HE	0	1	1
HW75	288	H	HE	0	1	1
HW75	289	HE	H	0	1	1
HW75	290	HE	H	0	1	1
HW75	291	HE	H	0	1	1
HW75	292	HE	H	0	1	1
HW75	293	HE	H	0	1	1
HW75	294	HE	H	0	1	1
HW75	295	HE	H	0	1	1
HW75	296	HE	H	0	1	1
HW75	297	HE	H	0	1	1
HW75	298	HE	H	0	1	1
HW75	299	HE	H	0	1	1
HW75	300	HE	H	0	1	1
BiakaPygmy	HGDP00448			0	1	0
BiakaPygmy	HGDP00451			0	1	0
BiakaPygmy	HGDP00454			0	1	0
BiakaPygmy	HGDP00455			0	1	0
BiakaPygmy	HGDP00457			0	1	0
BiakaPygmy	HGDP00458			0	1	0
BiakaPygmy	HGDP00459			0	1	0
BiakaPygmy	HGDP00460			0	1	0
BiakaPygmy	HGDP00461			0	1	0
BiakaPygmy	HGDP00464			0	1	0
BiakaPygmy	HGDP00465			0	1	0
BiakaPygmy	HGDP00466			0	1	0
BiakaPygmy	HGDP00469			0	1	0
BiakaPygmy	HGDP00470			0	1	0
BiakaPygmy	HGDP00472			0	1	0
BiakaPygmy	HGDP00473			0	1	0
BiakaPygmy	HGDP00475			0	1	0
BiakaPygmy	HGDP00477			0	1	0
BiakaPygmy	HGDP00479			0	1	0
BiakaPygmy	HGDP00985			0	1	0
BiakaPygmy	HGDP00986			0	1	0
BiakaPygmy	HGDP01084			0	1	1
BiakaPygmy	HGDP01085			0	1	1
BiakaPygmy	HGDP01086			0	1	0
BiakaPygmy	HGDP01087			0	1	0
BiakaPygmy	HGDP01088			0	1	0
BiakaPygmy	HGDP01089			0	1	0
BiakaPygmy	HGDP01090			0	1	0
BiakaPygmy	HGDP01091			0	1	0
BiakaPygmy	HGDP01093			0	1	0
BiakaPygmy	HGDP01094			0	1	0
Cambodian	HGDP00711			0	1	0
Cambodian	HGDP00712			0	1	1
Cambodian	HGDP00713			0	1	1
Cambodian	HGDP00714			0	1	0
Cambodian	HGDP00715			0	1	0
Cambodian	HGDP00716			0	1	0
Cambodian	HGDP00717			0	1	0
Cambodian	HGDP00718			0	1	1
Cambodian	HGDP00719			0	1	1
Cambodian	HGDP00720			0	1	0
Cambodian	HGDP00721			0	1	1
Colombian	HGDP00702			0	1	1
Colombian	HGDP00703			0	1	0
Colombian	HGDP00704			0	1	1
Colombian	HGDP00705			0	1	0
Colombian	HGDP00706			0	1	1
Colombian	HGDP00707			0	1	0
Colombian	HGDP00708			0	1	0
Colombian	HGDP00709			0	1	0
Colombian	HGDP00710			0	1	0
Colombian	HGDP00792			0	1	0
Colombian	HGDP00793			0	1	1
Colombian	HGDP00827			0	1	1
Colombian	HGDP00970			0	1	1
French	HGDP00511			0	1	0
French	HGDP00512			0	1	0
French	HGDP00513			0	1	1
French	HGDP00514			0	1	1
French	HGDP00515			0	1	0
French	HGDP00516			0	1	1
French	HGDP00517			0	1	1
French	HGDP00518			0	1	0
French	HGDP00519			0	1	0
French	HGDP00520			0	1	1
French	HGDP00521			0	1	0
French	HGDP00522			0	1	0
French	HGDP00523			0	1	1
French	HGDP00524			0	1	1
French	HGDP00525			0	1	0
French	HGDP00526			0	1	1
French	HGDP00527			0	1	1
French	HGDP00528			0	1	0
French	HGDP00529			0	1	1
French	HGDP00530			0	1	0
French	HGDP00531			0	1	1
French	HGDP00532			0	1	1
French	HGDP00533			0	1	0
French	HGDP00534			0	1	1
French	HGDP00535			0	1	1
French	HGDP00536			0	1	1
French	HGDP00537			0	1	1
French	HGDP00538			0	1	0
French	HGDP00539			0	1	1
Han	HGDP00774			0	1	0
Han	HGDP00775			0	1	0
Han	HGDP00776			0	1	1
Han	HGDP00777			0	1	0
Han	HGDP00778			0	1	0
Han	HGDP00779			0	1	0
Han	HGDP00780			0	1	0
Han	HGDP00781			0	1	1
Han	HGDP00782			0	1	0
Han	HGDP00783			0	1	1
Han	HGDP00784			0	1	1
Han	HGDP00785			0	1	0
Han	HGDP00786			0	1	0
Han	HGDP00811			0	1	1
Han	HGDP00812			0	1	1
Han	HGDP00813			0	1	1
Han	HGDP00814			0	1	1
Han	HGDP00815			0	1	0
Han	HGDP00817			0	1	1
Han	HGDP00818			0	1	1
Han	HGDP00819			0	1	0
Han	HGDP00820			0	1	1
Han	HGDP00821			0	1	0
Han	HGDP00822			0	1	0
Han	HGDP00971			0	1	0
Han	HGDP00972			0	1	1
Han	HGDP00973			0	1	0
Han	HGDP00974			0	1	1
Han	HGDP00975			0	1	1
Han	HGDP00976			0	1	1
Han	HGDP00977			0	1	0
Han	HGDP01021			0	1	1
Han	HGDP01023			0	1	1
Han	HGDP01024			0	1	1
Han-NChina	HGDP01287			0	1	1
Han-NChina	HGDP01288			0	1	0
Han-NChina	HGDP01289			0	1	0
Han-NChina	HGDP01290			0	1	0
Han-NChina	HGDP01291			0	1	1
Han-NChina	HGDP01292			0	1	0
Han-NChina	HGDP01293			0	1	0
Han-NChina	HGDP01294			0	1	0
Han-NChina	HGDP01295			0	1	0
Han-NChina	HGDP01296			0	1	0
Italian	HGDP01147			0	1	0
Italian	HGDP01151			0	1	0
Italian	HGDP01152			0	1	0
Italian	HGDP01153			0	1	0
Italian	HGDP01154			0	1	0
Italian	HGDP01155			0	1	0
Italian	HGDP01156			0	1	1
Italian	HGDP01157			0	1	1
Italian	HGDP01171			0	1	1
Italian	HGDP01172			0	1	1
Italian	HGDP01173			0	1	0
Italian	HGDP01174			0	1	0
Italian	HGDP01177			0	1	1
Japanese	HGDP00747			0	1	0
Japanese	HGDP00748			0	1	0
Japanese	HGDP00749			0	1	0
Japanese	HGDP00750			0	1	0
Japanese	HGDP00751			0	1	0
Japanese	HGDP00752			0	1	0
Japanese	HGDP00753			0	1	0
Japanese	HGDP00755			0	1	0
Japanese	HGDP00756			0	1	1
Japanese	HGDP00757			0	1	0
Japanese	HGDP00758			0	1	0
Japanese	HGDP00759			0	1	0
Japanese	HGDP00760			0	1	1
Japanese	HGDP00761			0	1	1
Japanese	HGDP00762			0	1	0
Japanese	HGDP00763			0	1	0
Japanese	HGDP00764			0	1	0
Japanese	HGDP00765			0	1	1
Japanese	HGDP00766			0	1	0
Japanese	HGDP00767			0	1	0
Japanese	HGDP00768			0	1	0
Japanese	HGDP00769			0	1	0
Japanese	HGDP00771			0	1	1
Japanese	HGDP00772			0	1	1
Japanese	HGDP00773			0	1	1
Japanese	HGDP00790			0	1	0
Japanese	HGDP00791			0	1	0
Japanese	HGDP00828			0	1	0
Maya	HGDP00854			0	1	1
Maya	HGDP00855			0	1	1
Maya	HGDP00856			0	1	0
Maya	HGDP00857			0	1	1
Maya	HGDP00858			0	1	1
Maya	HGDP00859			0	1	1
Maya	HGDP00860			0	1	1
Maya	HGDP00861			0	1	1
Maya	HGDP00862			0	1	1
Maya	HGDP00863			0	1	1
Maya	HGDP00864			0	1	1
Maya	HGDP00865			0	1	1
Maya	HGDP00866			0	1	0
Maya	HGDP00867			0	1	1
Maya	HGDP00868			0	1	1
Maya	HGDP00869			0	1	1
Maya	HGDP00870			0	1	1
Maya	HGDP00871			0	1	1
Maya	HGDP00872			0	1	1
Maya	HGDP00873			0	1	1
Maya	HGDP00874			0	1	1
Maya	HGDP00875			0	1	1
Maya	HGDP00876			0	1	1
Maya	HGDP00877			0	1	0
Maya	HGDP00878			0	1	0
Melanesian	HGDP00490			0	1	0
Melanesian	HGDP00491			0	1	0
Melanesian	HGDP00655			0	1	0
Melanesian	HGDP00656			0	1	1
Melanesian	HGDP00657			0	1	1
Melanesian	HGDP00658			0	1	1
Melanesian	HGDP00661			0	1	1
Melanesian	HGDP00662			0	1	0
Melanesian	HGDP00663			0	1	1
Melanesian	HGDP00664			0	1	1
Melanesian	HGDP00787			0	1	1
Melanesian	HGDP00788			0	1	0
Melanesian	HGDP00789			0	1	0
Melanesian	HGDP00823			0	1	0
Melanesian	HGDP00824			0	1	0
Melanesian	HGDP00825			0	1	1
Melanesian	HGDP00978			0	1	1
Melanesian	HGDP00979			0	1	0
Melanesian	HGDP01027			0	1	1
Palestinian	HGDP00675			0	1	0
Palestinian	HGDP00676			0	1	0
Palestinian	HGDP00677			0	1	0
Palestinian	HGDP00678			0	1	0
Palestinian	HGDP00679			0	1	1
Palestinian	HGDP00680			0	1	1
Palestinian	HGDP00681			0	1	1
Palestinian	HGDP00682			0	1	1
Palestinian	HGDP00683			0	1	1
Palestinian	HGDP00684			0	1	1
Palestinian	HGDP00685			0	1	1
Palestinian	HGDP00686			0	1	1
Palestinian	HGDP00687			0	1	1
Palestinian	HGDP00688			0	1	1
Palestinian	HGDP00689			0	1	1
Palestinian	HGDP00690			0	1	1
Palestinian	HGDP00691			0	1	1
Palestinian	HGDP00692			0	1	1
Palestinian	HGDP00693			0	1	1
Palestinian	HGDP00694			0	1	1
Palestinian	HGDP00695			0	1	1
Palestinian	HGDP00696			0	1	1
Palestinian	HGDP00697			0	1	1
Palestinian	HGDP00698			0	1	1
Palestinian	HGDP00699			0	1	1
Palestinian	HGDP00700			0	1	1
Palestinian	HGDP00722			0	1	0
Palestinian	HGDP00723			0	1	0
Palestinian	HGDP00724			0	1	0
Palestinian	HGDP00725			0	1	0
Palestinian	HGDP00726			0	1	0
Palestinian	HGDP00727			0	1	0
Palestinian	HGDP00728			0	1	0
Palestinian	HGDP00729			0	1	0
Palestinian	HGDP00730			0	1	0
Palestinian	HGDP00731			0	1	0
Palestinian	HGDP00732			0	1	0
Palestinian	HGDP00733			0	1	0
Palestinian	HGDP00734			0	1	0
Palestinian	HGDP00735			0	1	1
Palestinian	HGDP00736			0	1	1
Palestinian	HGDP00737			0	1	1
Palestinian	HGDP00738			0	1	1
Palestinian	HGDP00739			0	1	1
Palestinian	HGDP00740			0	1	1
Palestinian	HGDP00741			0	1	1
Palestinian	HGDP00742			0	1	1
Palestinian	HGDP00743			0	1	1
Palestinian	HGDP00744			0	1	1
Palestinian	HGDP00745			0	1	1
Palestinian	HGDP00746			0	1	1
Papuan	HGDP00540			0	1	0
Papuan	HGDP00541			0	1	0
Papuan	HGDP00542			0	1	0
Papuan	HGDP00543			0	1	0
Papuan	HGDP00544			0	1	1
Papuan	HGDP00545			0	1	0
Papuan	HGDP00546			0	1	0
Papuan	HGDP00547			0	1	0
Papuan	HGDP00548			0	1	0
Papuan	HGDP00549			0	1	0
Papuan	HGDP00550			0	1	0
Papuan	HGDP00551			0	1	0
Papuan	HGDP00552			0	1	1
Papuan	HGDP00553			0	1	0
Papuan	HGDP00554			0	1	1
Papuan	HGDP00555			0	1	0
Papuan	HGDP00556			0	1	0
Pima	HGDP01037			0	1	0
Pima	HGDP01038			0	1	1
Pima	HGDP01039			0	1	0
Pima	HGDP01040			0	1	0
Pima	HGDP01041			0	1	1
Pima	HGDP01042			0	1	0
Pima	HGDP01043			0	1	0
Pima	HGDP01044			0	1	0
Pima	HGDP01045			0	1	0
Pima	HGDP01046			0	1	0
Pima	HGDP01047			0	1	0
Pima	HGDP01048			0	1	0
Pima	HGDP01049			0	1	1
Pima	HGDP01050			0	1	0
Pima	HGDP01051			0	1	0
Pima	HGDP01052			0	1	0
Pima	HGDP01053			0	1	1
Pima	HGDP01054			0	1	1
Pima	HGDP01055			0	1	0
Pima	HGDP01056			0	1	0
Pima	HGDP01057			0	1	0
Pima	HGDP01058			0	1	1
Pima	HGDP01059			0	1	0
Pima	HGDP01060			0	1	0
Pima	HGDP01061			0	1	0
Russian	HGDP00879			0	1	0
Russian	HGDP00880			0	1	0
Russian	HGDP00881			0	1	1
Russian	HGDP00882			0	1	0
Russian	HGDP00883			0	1	0
Russian	HGDP00884			0	1	1
Russian	HGDP00885			0	1	1
Russian	HGDP00886			0	1	0
Russian	HGDP00887			0	1	0
Russian	HGDP00888			0	1	0
Russian	HGDP00889			0	1	1
Russian	HGDP00890			0	1	0
Russian	HGDP00891			0	1	0
Russian	HGDP00892			0	1	0
Russian	HGDP00893			0	1	0
Russian	HGDP00894			0	1	0
Russian	HGDP00895			0	1	0
Russian	HGDP00896			0	1	0
Russian	HGDP00897			0	1	0
Russian	HGDP00898			0	1	1
Russian	HGDP00899			0	1	1
Russian	HGDP00900			0	1	0
Russian	HGDP00901			0	1	1
Russian	HGDP00902			0	1	1
Russian	HGDP00903			0	1	1
San	HGDP00988			0	1	0
San	HGDP00991			0	1	0
San	HGDP00992			0	1	0
San	HGDP01029			0	1	0
San	HGDP01032			0	1	0
San	HGDP01036			0	1	0
Sardinian	HGDP00665			0	1	0
Sardinian	HGDP00666			0	1	0
Sardinian	HGDP00667			0	1	1
Sardinian	HGDP00668			0	1	0
Sardinian	HGDP00669			0	1	1
Sardinian	HGDP00670			0	1	0
Sardinian	HGDP00671			0	1	0
Sardinian	HGDP00672			0	1	1
Sardinian	HGDP00673			0	1	1
Sardinian	HGDP00674			0	1	0
Sardinian	HGDP01062			0	1	1
Sardinian	HGDP01063			0	1	0
Sardinian	HGDP01064			0	1	1
Sardinian	HGDP01065			0	1	1
Sardinian	HGDP01066			0	1	0
Sardinian	HGDP01067			0	1	0
Sardinian	HGDP01068			0	1	1
Sardinian	HGDP01069			0	1	0
Sardinian	HGDP01070			0	1	1
Sardinian	HGDP01071			0	1	0
Sardinian	HGDP01072			0	1	1
Sardinian	HGDP01073			0	1	0
Sardinian	HGDP01074			0	1	1
Sardinian	HGDP01075			0	1	0
Sardinian	HGDP01076			0	1	0
Sardinian	HGDP01077			0	1	0
Sardinian	HGDP01078			0	1	1
Sardinian	HGDP01079			0	1	0
She	HGDP01327			0	1	0
She	HGDP01328			0	1	0
She	HGDP01329			0	1	0
She	HGDP01330			0	1	0
She	HGDP01332			0	1	0
She	HGDP01333			0	1	0
She	HGDP01334			0	1	1
She	HGDP01335			0	1	1
She	HGDP01336			0	1	1
Sindhi	HGDP00163			0	1	0
Sindhi	HGDP00165			0	1	0
Sindhi	HGDP00167			0	1	0
Sindhi	HGDP00169			0	1	0
Sindhi	HGDP00171			0	1	0
Sindhi	HGDP00173			0	1	0
Sindhi	HGDP00175			0	1	0
Sindhi	HGDP00177			0	1	0
Sindhi	HGDP00179			0	1	0
Sindhi	HGDP00181			0	1	0
Sindhi	HGDP00183			0	1	0
Sindhi	HGDP00185			0	1	0
Sindhi	HGDP00187			0	1	0
Sindhi	HGDP00189			0	1	0
Sindhi	HGDP00191			0	1	0
Sindhi	HGDP00192			0	1	1
Sindhi	HGDP00195			0	1	1
Sindhi	HGDP00197			0	1	0
Sindhi	HGDP00199			0	1	0
Sindhi	HGDP00201			0	1	0
Sindhi	HGDP00203			0	1	0
Sindhi	HGDP00205			0	1	0
Sindhi	HGDP00206			0	1	1
Sindhi	HGDP00208			0	1	0
Sindhi	HGDP00210			0	1	1
Tuscan	HGDP01161			0	1	0
Tuscan	HGDP01162			0	1	0
Tuscan	HGDP01163			0	1	0
Tuscan	HGDP01164			0	1	0
Tuscan	HGDP01166			0	1	0
Tuscan	HGDP01167			0	1	0
Tuscan	HGDP01168			0	1	1
Tuscan	HGDP01169			0	1	1
Yakut	HGDP00945			0	1	0
Yakut	HGDP00946			0	1	0
Yakut	HGDP00947			0	1	0
Yakut	HGDP00948			0	1	0
Yakut	HGDP00949			0	1	0
Yakut	HGDP00950			0	1	0
Yakut	HGDP00951			0	1	0
Yakut	HGDP00952			0	1	0
Yakut	HGDP00953			0	1	0
Yakut	HGDP00954			0	1	0
Yakut	HGDP00955			0	1	1
Yakut	HGDP00956			0	1	1
Yakut	HGDP00957			0	1	1
Yakut	HGDP00958			0	1	0
Yakut	HGDP00959			0	1	1
Yakut	HGDP00960			0	1	0
Yakut	HGDP00961			0	1	0
Yakut	HGDP00962			0	1	0
Yakut	HGDP00963			0	1	1
Yakut	HGDP00964			0	1	0
Yakut	HGDP00965			0	1	0
Yakut	HGDP00966			0	1	1
Yakut	HGDP00967			0	1	1
Yakut	HGDP00968			0	1	0
Yakut	HGDP00969			0	1	0
Yi	HGDP01179			0	1	0
Yi	HGDP01180			0	1	0
Yi	HGDP01181			0	1	0
Yi	HGDP01182			0	1	0
Yi	HGDP01183			0	1	0
Yi	HGDP01184			0	1	0
Yi	HGDP01185			0	1	0
Yi	HGDP01186			0	1	0
Yi	HGDP01187			0	1	0
Yi	HGDP01188			0	1	1
Yoruba	HGDP00920			0	1	1
Yoruba	HGDP00921			0	1	1
Yoruba	HGDP00922			0	1	1
Yoruba	HGDP00923			0	1	0
Yoruba	HGDP00924			0	1	1
Yoruba	HGDP00925			0	1	1
Yoruba	HGDP00926			0	1	1
Yoruba	HGDP00927			0	1	0
Yoruba	HGDP00928			0	1	1
Yoruba	HGDP00929			0	1	0
Yoruba	HGDP00930			0	1	0
Yoruba	HGDP00931			0	1	0
Yoruba	HGDP00932			0	1	0
Yoruba	HGDP00933			0	1	1
Yoruba	HGDP00934			0	1	1
Yoruba	HGDP00935			0	1	1
Yoruba	HGDP00936			0	1	0
Yoruba	HGDP00937			0	1	0
Yoruba	HGDP00938			0	1	1
Yoruba	HGDP00939			0	1	1
Yoruba	HGDP00940			0	1	0
Yoruba	HGDP00941			0	1	0
Yoruba	HGDP00942			0	1	0
Yoruba	HGDP00943			0	1	0
Individuals with 100%, 75%, and 50% Native Hawaiian ancestry indicated by H100, H75, and H50 respectively. Individuals with one admixed parent indicated by HE, HC, HJ, HF, and HK, where H, E, C, J, F, and K denote Native Hawaiian, European, Chinese, Japanese, Filipino, and Korean descent respectively. In addition, HA75, HE75, HA50, and HE50 denote individuals with 75% Hawaiian - 25% Asian, 75% Ha…
