# Supplementary material for: Population Genetic Structure and Origins of Native Hawaiians in the Multiethnic Cohort Study
Source: PLoS One. 2012 Nov 7;7(11):e47881. doi: 10.1371/journal.pone.0047881 (PMC3492381; doi:10.1371/journal.pone.0047881)
Supplement: Table S3 — Individuals used for MDS mtDNA sequence analysis and corresponding haplogroup. (XLS) [file pone.0047881.s004.xls]

## Sheet: supp. table 3
Supplemental Table 3. Summary counts of subjects used for AIMS, GWAS, and mtDNA analysis*
	GWAS	Mitochondria	atleast 1
H100	40	160	192
HA50	30	0	30
HE50	35	0	35
HA75	25	0	25
HE75	18	0	18
*HA75, HE75, HA50, and HE50 denote individuals with 75% Hawaiian - 25% Asian, 75% Hawaiian - 25% European, 50% Hawaiian - 50% Asian, and 50% Hawaiian - 50% European ancestry respectively.
