# Supplementary material for: Population Genetic Structure and Origins of Native Hawaiians in the Multiethnic Cohort Study
Source: PLoS One. 2012 Nov 7;7(11):e47881. doi: 10.1371/journal.pone.0047881 (PMC3492381; doi:10.1371/journal.pone.0047881)
Supplement: Table S4 — Corresponding mtDNA position numbers used for mtDNA sequence analysis and rCRS allele. (XLS) [file pone.0047881.s005.xls]

## Sheet: supp. table 4
Supplemental Table 4. Individuals used for MDS mtDNA sequence analysis and corresponding haplogroup
ID	haplogroup
52	Q1
10	B4a1a1a3
11	B4a1a1a3
12	B4a1a1
8	B4a1a1a1
1	B4a1a1
2	B4a1a1a3
13	B4a1a1a1
3	B4a1a1a3
14	B4a1a1
4	B4a1a1
15	B4a1a1a1
5	B4a1a1a3
16	B4a1a1a1
17	B4a1a1a3
18	B4a1a1a3
19	B4a1a1
20	B4a1a1a1
21	B4a1a1a1
6	B4a1a1
7	B4a1a1
22	B4a1a1
23	B4a1a1a3
29	B4a1a1a3
30	B4a1a1a1
31	B4a1a1
32	B4a1a1
33	B4a1a1
34	B4a1a1
35	B4a1a1
36	B4a1a1a3
37	B4a1a1
38	B4a1a1a3
39	B4a1a1
40	B4a1a1
41	B4a1a1a3
42	B4a1a1a3
43	B4a1a1
44	B4a1a1a1
45	B4a1a1a3
46	B4a1a1a1
47	B4a1a1
48	B4a1a1a3
49	B4a1a1
50	B4a1a1a3
51	B4a1a1a3
53	B4a1a1
54	B4a1a1a3
55	B4a1a1a1
56	B4a1a1a1
57	B4a1a1
58	B4a1a1
59	B4a1a1a3
60	B4a1a1a3
61	B4a1a1
62	B4a1a1
63	B4a1a1
64	B4a1a1a3
65	B4a1a1a3
66	B4a1a1
67	B4a1a1
68	B4a1a1a3
69	B4a1a1a3
70	B4a1a1a1
71	B4a1a1a3
72	B4a1a1
73	B4a1a1
74	B4a1a1
75	B4a1a1
76	B4a1a1
77	B4a1a1
78	B4a1a1
79	B4a1a1
80	B4a1a1a3
81	B4a1a1a3
82	B4a1a1a1
83	B4a1a1a3
84	B4a1a1a1
85	B4a1a1a3
86	B4a1a1a1
87	B4a1a1a3
88	B4a1a1
89	B4a1a1a3
90	B4a1a1
91	B4a1a1
92	B4a1a1
93	B4a1a1a3
94	B4a1a1a3
95	B4a1a1a3
96	B4a1a1
97	B4a1a1a3
98	B4a1a1
99	B4a1a1a3
100	B4a1a1
101	B4a1a1a1
102	B4a1a1
103	B4a1a1a3
104	B4a1a1
105	B4a1a1a1
106	B4a1a1a3
107	B4a1a1
108	B4a1a1
109	B4a1a1
110	B4a1a1a3
111	B4a1a1
112	B4a1a1a3
113	B4a1a1a1
114	B4a1a1a3
115	B4a1a1a3
116	B4a1a1a3
117	B4a1a1a3
118	B4a1a1
119	B4a1a1a3
120	B4a1a1a3
121	B4a1a1a3
122	B4a1a1a3
123	B4a1a1a3
124	B4a1a1
125	B4a1a1a3
126	B4a1a1a3
127	B4a1a1
128	B4a1a1
129	B4a1a1
130	B4a1a1
131	B4a1a1
132	B4a1a1
133	B4a1a1
134	B4a1a1
135	B4a1a1a3
136	B4a1a1
137	B4a1a1a3
138	B4a1a1
139	B4a1a1
140	B4a1a1
141	B4a1a1a3
142	B4a1a1
143	B4a1a1a3
144	B4a1a1
145	B4a1a1a3
146	B4a1a1a3
147	B4a1a1
148	B4a1a1
149	B4a1a1
9	B4a1a1a3
150	B4a1a1
151	B4a1a1a3
152	B4a1a1
153	B4a1a1
154	B4a1a1
155	B4a1a1
156	B4a1a1
157	B4a1a1
158	B4a1a1
159	B4a1a1
160	B4a1a1
161	B4a1a1a3
162	B4a1a1
163	B4a1a1a1
164	B4a1a1
165	B4a1a1
EU007847	A2a2
EU482355	A2a
EU007894	A2b1
EU095533	A2b
EF657389	A2c
EF657585	A2d1
DQ282433	A2d1a
DQ282422	A2d2
DQ282418	A2d
EF657275	A2e
EF657254	A2f1
FJ705809	A2f1a
DQ282391	A2g1
EU597548	A2g
EF657311	A2h
EU431080	A2i
DQ282393	A2j1
DQ282387	A2j
DQ282390	A2k1
DQ282417	A2k
EU431082	A2n
EU095530	A2p
EU431081	A2q
AY519488	A4b
EF153775	A4c1
EU597576	A4c
AP008433	A5a1a1
AP008290	A5a1a1a
AP008396	A5a1a1b
AP008538	A5a1a2
AP009468	A5a1a
AP008562	A5a1b
AP008791	A5a2
AP008747	A5a
AP010724	A5b
AP008874	A5c
AY255166	A6
AP008307	A7
EF153797	A8
EU597580	B2
EU431083	B2a1
DQ282444	B2a1a
DQ282441	B2a2
EU095532	B2b
DQ282440	B2c1
DQ282436	B2c
EU095550	B2d
EU597569	B2e
EU597559	B4
AY289076	B4a1a1
AY289093	B4a1a1a1
FJ767912	B4a1a1a2
EU597555	B4a1a1a
DQ372874	B4a1a1b
AJ842748	B4a1a2
DQ372871	B4a1a
AP008842	B4a1b1
AF346993	B4a1b1a
AP008595	B4a1b
AP008912	B4a1c1
AY519495	B4a1c2
AP008521	B4a1c3
AP010705	B4a1c3a
EU597505	B4a1c4
AP008257	B4a2
AJ842750	B4a2a
AP008384	B4a
AP008601	B4b1a1
AP008594	B4b1a1a
EU597553	B4b1a2
AY255170	B4b1a2a
AY519494	B4b1a
AP008550	B4b1b
DQ272119	B4b1c
AP008298	B4c1a1
AP008604	B4c1a1a
AP008688	B4c1a2
AP010696	B4c1a
AP008899	B4c1b1
AP008393	B4c1b1a
AP010718	B4c1b2
AP008472	B4c1b
AP008450	B4c1c1
AP009436	B4c1c
AY289101	B4c2
AF347011	B4c2a
AY255135	B4d1
AY255140	B4d2
AP008712	B4d3
AP008492	B4d
AP008436	B4e
AP008262	B4f1
AP008788	B4f
AY255133	B4g
DQ834254	B5a1
AY950286	B5a1a1
EU597566	B5a1a
AY255145	B5a1b
DQ372869	B5a2
EF114286	B5a2a
AP010771	B5b1
AP008827	B5b1a
AP008518	B5b1b
GQ119020	B5b1c
AY255179	B5b2a
AP008910	B5b2b1
AP008846	B5b2b
AP008584	B5b2c
AP008566	B5b3
AY255136	B7
FJ383597	C4a1a
EU482371	C4a1c1
EU482322	C4a1c
EU007861	C4a2
FJ383606	C4a3
FJ383631	C4a3a
FJ383647	C4a4
FJ383607	C4a4a
AY195772	C4b1
AY570526	C4b1a
AY195763	C4b2
AF346970	C4b3
EU482310	C4b3a
EU482314	C4b
EU095543	C4c
AY615359	C5
EU597542	C5a1
EU482306	C5a2
GQ853199	C5b1
EU482321	C5b
EU482307	C5c1
DQ112787	C5c
FJ383641	C7
EF429136	C7a
EU725621	D2a1
EU660538	D2a1a
EU660553	D2a1b
EU482339	D2a2
EU660548	D2a
EF153796	D2b1
EU095542	D2b
EU482316	D3
AP011004	D4b2
AP008286	D4b2a1
AP008256	D4b2a2
AP008703	D4b2a2a
AP010697	D4b2a2b
AP008434	D4b2a
AP008264	D4b2b1
AP008467	D4b2b1a
AP008333	D4b2b1b
AP008457	D4b2b2
AP008331	D4b2b3
AP008757	D4b2b
FJ383191	D4b2c
AP009433	D4c1a1
AP008633	D4c1a
AP008494	D4c1b1
AP008251	D4c1b
AP008564	D4c2
AP008628	D4d
AP008275	D4e1a1
FJ383207	D4e1a2
AP008772	D4e1a2a
AP008789	D4e1a
AP008380	D4e2
AP008834	D4e2a
AP008352	D4e2b
AP008309	D4e2c
FJ383174	D4e3
AP008739	D4e
AP008458	D4f1
EU007883	D4f
AP008667	F1a1
AY963572	F1a1a1
AY255175	F1a1a
AP008347	F1a1b
AP008475	F1a1c
AY255164	F1a2
AP008679	F1a3
AP008446	F1b1
AP008591	F1b1a1
AP010731	F1b1a1a1
AP009474	F1b1a1a1a
AP010754	F1b1a1a2
AP008421	F1b1a1a
AP008577	F1b1a
AY255177	F1c
AP008328	F1d
AP008508	F1e1
EU597547	F1e
AP010683	F2
AP008692	F2a
EF153773	G1a1
AP008696	G1a1a1
AP008760	G1a1a2
AP008909	G1a1a3
AP008845	G1a1a4
AP010753	G1a1a
DQ272115	G1a2
AP008442	G1a3
AY195762	G1b
AY255137	G1c
FJ198217	G2a1
AP008535	G2a1b
AP008401	G2a1c1
AP008386	G2a1c
AP008313	G2a1d1
AP008427	G2a1d
AP008528	G2a1e
AP008897	G2a5
AY255139	G2b1a
FJ383505	G2b1b
EU597571	G2b2
FJ383509	G2b2a
DQ272108	G3a1
AP008645	G3a2
DQ272110	G3b1
DQ272109	G3b
AP008911	G4
AY495188	H1a1
EU130562	H1a2
AY738972	H1a3
EU130942	H1a
AY738975	H1b
AY495157	H1c1
AY495096	H1c2
EF177411	H1c3
AY495102	H1c
EF660949	H1e1
EU597560	H1e1a
AY495094	H1e2
EU555475	H1e
AY339413	H1f
EF657466	H1g
AY339412	H1h
EU568371	H1i
EU372630	H1j
EU770202	H1k
AY495152	H1m
FJ348199	H1n
EF556177	H1o
EF556184	H1p
EF660973	H1q
AF346981	H1r
GQ478575	H1s
EF177427	H1t
AY495103	H1u
EU597521	H2a1
FJ668389	H2a1a
NC_012920	H2a2a
EU443605	H2a2b1
AY339426	H2a2b
AY339429	H2a3
AM263179	H2a4
DQ112834	H2a5
AY738963	H2a5a
EU597492	H2a
AY738961	H2b
AY738986	H3a
AY738988	H3b
AY738991	H3c
AY495180	H3d
FJ348204	H3e
DQ523639	H3f
AY495142	H3g
EU935460	H4
AY495184	H4a1a1
AY495186	H4a1a1a
AY495095	H4a1a
EF556191	H4a1b
AY738950	H4a2
AY495123	H4a
AM263185	H4b
FJ210914	HV1a1
EF556168	HV1a1a
EU935461	HV1a2
EF556182	HV1b1
DQ856316	HV1b2
AY738942	HV1b
EF556190	HV1c
AY713986	HV2
EU567452	HV2a
EU545447	HV4
EF660939	HV4a
DQ377992	HV5
EF222232	HV6
EU545454	HV6a
EU545443	HV7
EU545457	HV8
EF222233	HV9
EU545422	HV9a
AY495232	J1b1a1
FJ213450	J1b1a2
EU915478	J1b1a
EF556155	J1b1b1
AY714033	J1b1b
EF556169	J1b2
EF583175	J1b3
AY495208	J1c1
AY495210	J1c1a
EF177420	J1c1b1
AY714034	J1c1b1a
AY495202	J1c1b
AY495223	J1c2
AY495222	J1c2b
FJ348202	J1c2c
AY495214	J1c3
EF657560	J1c3a1
AY495213	J1c3a
FJ445407	J1c3b1
EF657671	J1c3b
EF657260	J1c3c
AY665667	J1c4
EF657710	J1c5
DQ112793	J1c5a
AY495196	J1c6
EU151466	J1c7
FJ348162	J1c7a
AY339586	J1c8
AY495205	J1c
AF382001	J1d1
DQ341088	J1d
EF485042	K1a10
EU523125	K1a11
FJ460551	K1a12
EU600362	K1a12a
EU284179	K1a1b1
DQ301803	K1a1b1a
EF657243	K1a1b1b
FJ865502	K1a1b2
AY714044	K1a1b2a
GQ281051	K1a2
EU915473	K1a2a
EU330213	K1a3
AY495258	K1a3a1
DQ301814	K1a3a1a
AY495256	K1a3a
FJ460525	K1a4a1
AY495265	K1a4a1a
EU677385	K1a4a1b
EU603401	K1a4a
DQ112930	K1a4b1
EU675299	K1a4b
DQ301809	K1a4c
EU926621	K1a4d
DQ301793	K1a5
DQ301799	K1a6
DQ301807	K1a7
DQ301817	K1a8
DQ301816	K1a8a
DQ301808	K1a9
DQ304995	L3b1a1
EU092744	L3b1a2
EU092826	L3b1a3
FJ460536	L3b1a4
DQ304991	L3b1a
EU092682	L3b1b1
DQ112738	L3b1b
EU092725	L3b2
EU092660	L3c
EU092898	L3d1-5
EU092876	L3d1a1
EU092702	L3d1a1a
EU092796	L3d1a
DQ341072	L3d1b1
EU092899	L3d1b
EU092762	L3d1c
AY195782	L3d1d
EU597512	L3d2
AF381998	L3d3
EU092851	L3d3a
EU092742	L3d4
EU597500	L3d5
DQ112884	L3d
EU092827	L3e1
EU092749	L3e1a1a
EU092847	L3e1a2
EU092709	L3e1a3
EU092675	L3e1b
EU092879	L3e1c
EU092862	L3e1d
EU092915	L3e1e
DQ305026	L3e2a1a
DQ305031	L3e2a1b1
DQ305025	L3e2a1b
EU092729	L3e2a
DQ305022	L3e2b1
AF347015	L3e2b1a
EU092777	L3e2b2
DQ305008	L3e2b3
DQ305019	L3e2b
DQ305012	L3e3a
DQ305013	L3e3b1
DQ305011	L3e3b
DQ112722	L3e4
EU092776	L3e5
DQ341078	L3f1a
DQ305036	L3f1b1
EU092805	L3f1b2
EU935451	L3f1b2a
EU092883	L3f1b3
EU092704	L3f1b4
EU092912	L3f1b4a1
EU092865	L3f1b4a
DQ341077	L3f1b
DQ341076	L3f2
EU092770	L3f2b
FJ625850	L3f3
FJ625855	L3f3a
DQ112957	L3h1a1
AF347000	L3h1a2a
EU092772	L3h1a2b
EU092828	L3h1b1
EU092903	L3h1b1a1
DQ341079	L3h1b1a
EU092736	L3h1b
DQ341080	L3h2
DQ112958	L3i1a
DQ341069	L3i1b
DQ341068	L3i2
DQ112956	L3j
EU092824	L3k
DQ341067	L3x1
DQ341066	L3x2a1
EU092684	L3x2a1a
EU092944	L3x2a
EU092818	L3x2b
EU443499	M2a1
EU443472	M2a1a1
FJ383240	M2a1a1a1
EU443508	M2a1a1a
EU443509	M2a1a1b1
EU443507	M2a1a1b
EU443493	M2a1a2
FJ383280	M2a1a2a1
FJ383276	M2a1a2a1a
EU443494	M2a1a2a
EU443502	M2a1a3
EU443467	M2a1a3a1
EU443470	M2a1a3a
FJ383272	M2a1a3b
EU443460	M2a1a
EU443454	M2a1b
EU443443	M2a1c
EU443487	M2a2
FJ383239	M2a2a
EU443450	M2a3
EU443447	M2a3a
EU443481	M2b1
EU443483	M2b1a
EU443496	M2b1b
EU443463	M2b2
EU443486	M2b
FJ770946	M3
GQ119036	P10
AF347004	P1
EU597507	P1d1
AY289092	P1d
DQ112897	P2
AY289052	P3a
EF061153	P3b1
AY289091	P3b
EF495221	P4a1
EF061158	P4a
DQ404444	P4b1
AY289064	P4b
AY289063	P5
AY289053	P6
AY289054	P7
GQ119026	P8
DQ404446	P9
EU369395	T1
AY495294	T1a1
AY714036	T1a1b1
AY339575	T1a1b
FJ348220	T1a2
AY495296	T1a3
EU935435	T1a
AY339570	T1b
EF177442	T2
EF657558	T2a1
FJ348180	T2a1a1
AY495300	T2a1a
EF657600	T2a1b
FJ238094	T2a
EF177444	T2b1
AY495305	T2b2
AY495275	T2b3
DQ523649	T2b3a
EU007872	T2b4
AY495287	T2b5
AY495284	T2b6
FJ348208	T2b
DQ112814	T2c1
EF556160	T2c1a
DQ523629	T2c1b
AY339566	T2c
AY714037	T2d
EF556188	T2e1
EF060363	T2e2
EF177410	T2e
AY339569	T2f1
DQ112763	T2f
EU007862	T2g
EU597564	U4a1
AY882386	U4a1a
EU545429	U4a1b
EU545428	U4a1c
EU545442	U4a2
EF222237	U4a2a1
EF222239	U4a2a
AY339550	U4a2b
EF222242	U4a2c1
EU545464	U4a2c
EU545423	U4a3
FJ460530	U4b1a1
EF660921	U4b1a2
EU545419	U4b1a3
EU571946	U4b1a3a
EU545463	U4b1b
GQ891957	U4b2
EU007874	U4b
EF657423	U4c1
EU545465	U4c1a
EU545460	U4c
EU439939	X2a1
EU095249	X2a1a1
FJ168759	X2a1a
FJ168762	X2a1b1
FJ168763	X2a1b1a
FJ168761	X2a1b
EU095244	X2a1c
FJ825753	X2a2
EF556159	X2b1
AF381986	X2b2
DQ523642	X2b3
EU600321	X2b4
FJ457949	X2b
AY195773	X2c1
FJ348156	X2c1a
DQ523631	X2c
GQ231312	X2d
FJ168756	X2g
