# Supplementary material for: Population Genetic Structure and Origins of Native Hawaiians in the Multiethnic Cohort Study
Source: PLoS One. 2012 Nov 7;7(11):e47881. doi: 10.1371/journal.pone.0047881 (PMC3492381; doi:10.1371/journal.pone.0047881)
Supplement: Table S5 — Nine diagnostic markers for mtDNA haplogroup Q1 and allelic states for individual 52 and rCRS. (XLS) [file pone.0047881.s006.xls]

## Sheet: supp. table 5
Supplemental Table 5. Corresponding mtDNA position numbers used for mtDNA sequence analysis and rCRS allele*
position	rCRS allele
663	A
709	G
710	T
750	A
769	G
813	A
825	T
827	A
841	A
1018	G
1048	C
1185	C
1189	T
1438	A
1442	G
1598	G
1692	A
1719	G
1736	A
1738	T
1780	T
1811	A
1888	G
2352	T
2416	T
2706	A
2758	G
2768	A
2789	C
2885	T
3010	G
3197	T
3308	T
3396	T
3398	T
3480	A
3516	C
3594	C
3639	A
3666	G
3693	G
3705	G
3918	G
3970	C
4071	C
4104	A
4216	T
4248	T
4312	C
4314	T
4491	G
4586	T
4715	A
4769	A
4820	G
4824	A
4833	A
4883	C
4917	A
5036	A
5046	G
5108	T
5147	G
5178	C
5231	G
5393	T
5417	G
5442	T
5460	G
5465	T
5471	G
5601	C
5603	C
5655	T
5773	G
5951	A
5999	T
6071	T
6185	T
6371	C
6392	T
6446	G
6455	C
6548	C
6671	T
6680	T
6719	T
6827	T
6905	A
6962	G
6989	A
7028	C
7055	A
7146	A
7175	T
7196	C
7256	C
7274	C
7389	T
7424	A
7521	G
7768	A
7771	A
7853	G
7867	C
8020	G
8027	G
8206	G
8248	A
8251	G
8414	C
8428	C
8468	C
8538	T
8566	A
8584	G
8655	C
8697	G
8701	A
8794	C
8860	A
8994	G
9042	C
9055	G
9072	A
9123	G
9145	G
9221	A
9347	A
9449	C
9477	G
9540	T
9545	A
9698	T
9755	G
9818	C
9950	T
10115	T
10238	T
10321	T
10373	G
10398	A
10400	C
10451	T
10463	T
10550	A
10589	G
10664	C
10688	G
10810	T
10819	A
10873	T
10915	T
11176	G
11215	C
11251	A
11299	T
11467	A
11641	A
11719	G
11812	A
11914	G
11944	T
12007	G
12236	G
12239	C
12245	T
12308	A
12358	A
12372	G
12403	C
12406	G
12501	G
12519	T
12612	A
12693	A
12705	C
12720	A
12771	G
12810	A
13105	A
13135	G
13263	A
13276	A
13368	G
13485	A
13506	C
13590	G
13617	T
13650	C
13708	G
13759	G
13789	T
13803	A
13880	C
13966	A
14000	T
14022	A
14110	T
14148	A
14167	C
14178	T
14182	T
14203	A
14212	T
14233	A
14308	T
14318	T
14560	G
14566	A
14569	G
14620	C
14668	C
14766	C
14769	A
14783	T
14798	T
14905	G
14911	C
15043	G
15110	G
15115	T
15136	C
15217	G
15244	A
15301	G
15326	A
15346	G
15431	G
15452	C
15466	G
15535	C
15607	A
15670	T
15746	A
15776	A
15784	T
15924	A
15927	G
15928	G
15930	G
*mtDNA haplogroup identifying markers found within www.mitomap.org, and maf <2% are excluded from list.
